1 **A wide foodomics approach coupled with metagenomics elucidates the environmental**  
2 **signature of Protected Geographical Indication potatoes**

3 Anastasia Boutsika<sup>1,2,#</sup>, Michail Michailidis<sup>3#</sup>, Theodoros Moysiadis<sup>1</sup>, Athanasios  
4 Dalakouras<sup>1</sup>, Christina Skodra<sup>4</sup>, Aliko Xanthopoulou<sup>1,3</sup>, George Stamatakis<sup>5</sup>, Martina  
5 Samiotaki<sup>5</sup>, Georgia Tanou<sup>3,6</sup>, Maria Ganopoulou<sup>7</sup>, Lefteris Angelis<sup>7</sup>, Christos Bazakos<sup>1,3,7</sup>,  
6 Athanassios Molassiotis<sup>4</sup>, Irimi Nianiou-Obeidat<sup>2</sup>, Ifigeneia Mellidou<sup>1,3\*</sup>, Ioannis  
7 Ganopoulos<sup>1,3\*</sup>

8 <sup>1</sup>Institute of Plant Breeding and Genetic Resources, ELGO-DIMITRA, Thessaloniki Themi,  
9 570001, Greece

10 <sup>2</sup>Laboratory of Genetics and Plant Breeding, School of Agriculture, Aristotle University,  
11 54124 Thessaloniki, Greece

12 <sup>3</sup>Joint Laboratory of Horticulture, ELGO-DIMITRA, Thessaloniki-Thermi 57001, 21 Greece

13 <sup>4</sup>Laboratory of Pomology, Department of Horticulture, Aristotle University of Thessaloniki,  
14 57001 Thessaloniki-Thermi, Greece

15 <sup>5</sup>Institute for Bioinnovation, Biomedical Sciences Research Center “Alexander Fleming”,  
16 16672, Vari, Greece

17 <sup>7</sup>School of Informatics, Aristotle University of Thessaloniki, 54124 Thessaloniki, Greece

18 <sup>6</sup>Institute of Soil and Water Resources, ELGO-DIMITRA, Thessaloniki-Thermi, 57001,  
19 Greece

20 <sup>7</sup>Max Planck Institute for Plant Breeding Research, Department of Comparative Development  
21 and Genetics, Carl-von-Linné-Weg 10, 50829 Cologne, Germany

22 #The first two authors contributed equally to this work

23 \*Authors for correspondence: Ioannis Ganopoulos ([giannis.ganopoulos@gmail.com](mailto:giannis.ganopoulos@gmail.com)) and  
24 Ifigeneia Mellidou ([imellidou@elgo.gr](mailto:imellidou@elgo.gr))

25

26

27

28

29

30

## 31 **SUMMARY**

32 The term “terroir” has been widely employed to link differential geographic phenotypes with  
33 sensorial signatures of agricultural food products, influenced by agricultural practices, soil  
34 type and climate. Nowadays, the Geographical Indications labeling encapsulated by the  
35 concept of terroir has been developed to safeguard the quality of plant-derived food and is  
36 generally considered as an indication of superior organoleptic properties and phytochemical  
37 profile. As the dynamics of agroecosystems are highly intricate, consisting of tangled  
38 networks of interactions between plants, microorganisms, and the surrounding environment,  
39 the recognition of the key molecular components of terroir fingerprinting remains a great  
40 challenge to protect both the origin and the safety of food commodities. Furthermore, the  
41 contribution of microbiome as a potential driver of the terroir signature has been  
42 underestimated until recently. Herein, we present a first comprehensive view of the multi-  
43 omic landscape related to transcriptome, proteome, epigenome, and metagenome of the  
44 popular Protected Geographical Indication potatoes of Naxos.

## 45 **INTRODUCTION**

46 Nowadays, given the globalization as well as the numerous technological developments and  
47 innovations that govern the food market, consumer’s expectations have been tremendously  
48 increased in terms of information reliability. Therefore, the food industry and governments  
49 should be provided with valid analytical methods and regulatory frameworks to ensure food  
50 certification via the reliability of food labels taking into account consumer’s requirements. In  
51 the past decades, a plethora of deception incidents have been occurred, bewildering the food  
52 market (Braconi et al., 2021). Consequently, international operations have developed a  
53 profound interest in preventing food fraud and securing food authentication. One of the most  
54 common frauds involves selling low-quality food products at high prices. Accordingly, food  
55 labels could include fabricated geographical origin or genetic identity, as well as inaccuracies  
56 in the production process (Braconi et al., 2021). Although food fraud appears to be price-  
57 related, in some cases ingredients dangerous to human health and allergens may be included  
58 in these food products, endangering consumer safety (Braconi et al., 2021).

59 To prevent fraud of food products, scientists have developed several rapid, reliable, and  
60 efficient -omics technologies for certification and identification, including genomics,

61 epigenomics, transcriptomics, proteomics and metabolomics. The term ‘Foodomics’,  
62 concerning the study of Food and Nutrition in combination with -omics technologies, was  
63 initially launched in 2009 (Capozzi and Bordoni, 2012). Despite the short time that the  
64 ‘Foodomics’ domain exists in the scientific community, a wealth of technologies has been  
65 developed aiming to study the quality, the origin, and the safety of human nutrition (Ahmed et  
66 al., 2022). The most popular and intriguing challenge in food research is the validity of food  
67 labels, especially on products designated as Protected Designation of Origin (PDO) or  
68 Protected Geographical Indication (PGI), according to the EU geographical indications  
69 system for food quality.

70 Potato (*Solanum tuberosum* L.) was a fundamental species in human nutrition especially in  
71 the context of an ever-increasing population. Nowadays, potato remains one of the most  
72 popular and crucial nongrain food crops, occupying a prominent place in the agenda of global  
73 food security (Pearsall, 2008; Spooner et al., 2005). According to Plant Production and  
74 Protection Division, 2009, it is estimated that two billion people worldwide are closely  
75 associated with potato cultivation for nutritional or income reasons, rendering it as “Food for  
76 the Future” (Ortiz and Mares, 2017).

77 Using potato as a plant model, in this proof-of-concept study we present the first multi-omics  
78 analysis across genome-wide DNA methylation, RNA sequencing and quantitative  
79 proteomics to obtain the molecular portrait of the famous PGI potatoes of the Naxos Island at  
80 harvest and after storage. We also employed a metagenomic approach to discriminate potato  
81 tubers produced in diverse regions based on the distinct microbiological patterns, which in  
82 turn were coupled with the -omics datasets. Through this approach, key environmental-  
83 derived molecular factors through the dynamics of causal models were revealed.

## 84 **Results**

### 85 **Bacterial community dynamics in periderm of tubers**

86 The tubers are harvested and traded with soil residues in the periderm, which makes them  
87 ideal for using the microbial community profiling as potential signatures in PGI certification.  
88 Thus, to detect distinct differences in the tuber bacterial profiles cultivated in the two different  
89 agroecosystems, bacterial 16S rRNA gene amplicon sequencing was performed in the tubers  
90 obtained at harvest and post-harvest (storage) (Figure 1, Table S1). The alpha-diversity  
91 highlighted greater species richness in the tubers from Naxos. Regarding species diversity, the

92 microbial differences were only evident at post-harvest period, with tubers from Naxos  
93 exerting higher microbiome diversity (Figure 1B). These results may be indicative of the  
94 more rich and diverse microbial community of the PGI potato, especially after storage. By  
95 contrast, tubers from Lakoma (herein served as control), seemed to be dominated by fewer  
96 microbial species. Overall, microbiome communities at harvest of the Naxos tubers were  
97 dominated by *Lysobacter*, *Neobacillus* and *Priestia*, whilst the most abundant microbiota in  
98 the Lakoma tubers were *Rhizobium*, *Devosia*, *Sphingomonas* and *Rhodoligotrophos* (Figure  
99 1C). Similar taxa were recorded as abundant for tubers at post-harvest, with several of them  
100 being widely recognized as plant growth-promoting rhizobacteria. Our data also demonstrated  
101 that, regardless the collection site, tubers at post-harvest maintained their microbial  
102 community profiles at the genus level to a great extent, providing a tool for PGI signature.

103 The NMDS analysis with the Bray–Curtis dissimilarity ( $\beta$ -diversity) indicated that tubers  
104 from the two different agroecosystems were grouped separately from each other (Figure 1D),  
105 validating our hypothesis that the collection sites have distinct microbial community  
106 composition. In addition, tanglegrams between bacterial dendrograms showed that the  
107 bacterial structures between the two agroecosystems were dissimilar both at harvest and post-  
108 harvest (Figure 1E). The LEfSe analysis detected 18 and 41 bacterial clades in the tubers at  
109 harvest and post-harvest, respectively, discriminating the terroir-specific microbial  
110 communities in the two geographic regions. The dominant bacteria genus at harvest were  
111 *Neobacillus* and *Massilia* in Naxos and Lakoma, respectively. At post-harvest, candidate  
112 biomarkers belong to the genus of *Neobacillus* and *Priestia* for tubers of Naxos, or of  
113 *Rhizobium* and *Rhodoligotrophos* for tubers of Lakoma. These potential biomarkers were  
114 associated with each terroir, revealing their geographic-origin dissimilarities. Interestingly,  
115 one genus identified as bacterial biomarker of Naxos, *Neobacillus*, was detected both at  
116 harvest and at post-harvest. Therefore, this genus not only seemed to be abundant in the PGI  
117 potatoes, but it also remained abundant after storage, dominating the microbial community of  
118 potato tubers, and thus representing an excellent putative ‘terroir’ biomarker for traceability.

### 119 **Individually constant methylated genes, expressed transcripts, and level of proteins in** 120 **PGI potato tubers**

121 To gain a comparative insight into how different environments built PGI signature, large scale  
122 -omics technologies, i.e., epigenomics, transcriptomics, and proteomics, were applied.

### 123 *Epigenetic marks of the potatoes from the two geographic regions*

124 Plant epigenetic profile can be highly dynamic and plastic in diverse environmental  
125 conditions (Dalakouras and Vlachostergios, 2021), therefore we compared the DNA  
126 methylome of the tested potatoes (PGI and control) at harvest and at post-harvest using whole  
127 genome bisulfite sequencing (WGBS). Chromosome level analysis of differentially  
128 methylated regions (DMRs) at harvest and post-harvest revealed hypomethylation and  
129 hypermethylation events in both gene regions and transposable elements (TEs) (Figure 2A).  
130 DMR methylation level cluster heatmap and violin plot highlighted even further these  
131 differences (Figures 2B and 2C). Focusing on DMR-associated genes (DMGs) exhibiting  
132 hypermethylation or hypomethylation, we could detect at least 13 and 29 DMGs at harvest  
133 and post-harvest, respectively (Figure 2D). When analyzing the distribution of DNA  
134 methylation among various gene features, most DNA methylation (especially at CG context)  
135 was recorded in the promoter and intron sequences rather than in exon and UTR sequences  
136 (Figure 2E). The distribution of DNA methylation in upstream 2K and downstream 2K  
137 regions, we observed that while gene bodies exhibited high mCG/CG but low mCHH/CHH  
138 ratio, the opposite took place in upstream 2K and downstream 2K sequences (Figure 2F).  
139 Based on Kyoto Encyclopedia of Genes and Genomes (KEGG) pathway enrichment analysis,  
140 DMGs were mainly assigned to metabolic pathways and biosynthesis of secondary  
141 metabolites (Figure 2G). A heatmap of DMGs displaying simultaneously all three sequence  
142 contexts (CG, CHG, CHH) allowed a broader overview of the epigenetic plasticity events at  
143 both examined periods between the two regions (Figure 2H). For instance, the  
144 hypermethylation of a putative DETOXIFICATION 18 (Soltu.Atl.10\_4G001390) has been  
145 detected at harvest, whereas hypomethylation of three chloroplastic plastoglobulins-1  
146 (Soltu.Atl.08\_1G001340, Soltu.Atl.08\_3G001840, Soltu.Atl.08\_3G001850) has been  
147 determined at post-harvest.

### 148 *Transcriptomic profiles of the potatoes from two distinct geographic regions*

149 RNA-seq experiment was also conducted for the same samples as used for methylation  
150 analysis (Table S3). TPM-normalized values for each transcript were hierarchical-clustered  
151 and used to generate a heatmap that clearly shows a distinct expression pattern according to  
152 region and especially to stage (Figure 3A). Venn diagram showed genes that were commonly  
153 and exclusively modulated by the different environments and stages in potato (Figure 3B).  
154 For example, 940 and 947 genes were differentially expressed in 'Naxos' potatoes compared

155 to the ‘Lakoma’ ones at harvest and at post-harvest, respectively (Figure 3B). Interestingly,  
156 we found 31 commonly expressed DEGs between Naxos and Lakoma, at harvest and at post-  
157 harvest, including cysteine protease inhibitor (Soltu.Atl.03\_3G022650) and Kunitz trypsin  
158 inhibitors (Soltu.Atl.03\_4G014820).

### 159 *Protein signature of the PGI potato tubers*

160 To interpret the proteomic data in a PGI context, we focused only on proteins that constantly  
161 accumulated in the tubers of Naxos (PGI) at both stages. Proteomic data were clustered via  
162 Hierarchical Cluster Analysis demonstrating a distinct separation mainly between regions and  
163 secondly between stages (Figure 3C). Volcano plots revealed 156 and 78 differentially  
164 expressed proteins (DEPs) that were increased in Naxos vs Lakoma, at harvest and post-  
165 harvest, respectively (Figures 3D, 3E). Similarly, 182 and 157 DEPs decreased in Naxos vs  
166 Lakoma, at harvest and post-harvest, respectively (Figures 3D, 3E). Four proteins were  
167 increased in Naxos compared to Lakoma in both stages, being annotated as ribosomal protein  
168 L1p/L10e family (Soltu.Atl.11\_1G013990.1), DNAJ heat shock N-terminal d-c  
169 (Soltu.Atl.03\_1G024300.1), acyl carrier protein (Soltu.Atl.06\_2G011230.1) and sucrose  
170 synthase (Soltu.Atl.09\_1G015370.3). Moreover, 35 proteins (i.e., serine protease inhibitors,  
171 peroxidases, basic chitinases and Kunitz trypsin inhibitors) were decreased in both stages of  
172 Naxos compared to Lakoma (Figure 3E).

### 173 **Transcriptome-based pairwise co-expression analysis across multi-omics datasets** 174 **reveals molecular hallmarks in PGI potatoes**

175 There is a large interest in networked food science experiments for characterizing PGI  
176 signatures at molecular scale. Consequently, our work presents a pipeline system for pairwise  
177 integration and transcriptome-based co-expression analysis of epigenomic, transcriptomic,  
178 and proteomic data (Figure 4, Tables S6-S9). Our findings indicated that Pearson correlation  
179 coefficients showed negative values between the transcriptome and methylome datasets for  
180 both promoter (53.3%) and gene (50.58%), with 1% and 1.16% significant values (Figures  
181 4A, 4B) while between the transcriptome and proteome datasets, positive correlation values  
182 were mostly observed (52.67%), with a 4.94% out of them being significant (Figure 4C).  
183 Methylation datasets of Naxos and Lakoma were positively correlated only at harvest stage  
184 (Figures 4D, 4E), while their proteomes exhibited positive trends (Figure 4F). Regarding  
185 methylation and transcriptomic values, no IDs were detected in Naxos for both promoter and

186 genebody, whereas only one ID (promoter) and two IDs (genebody) were found at both  
187 examined stages in Lakoma (Figures 4G, 4H). One gene ID for Naxos  
188 (Soltu.Atl.06\_3G007420; Fe superoxide dismutase) and seven for Lakoma (etc.  
189 Soltu.Atl.01\_2G024990; GDSL-like lipase/acylhydrolase superfamily protein,  
190 Soltu.Atl.03\_3G018760; peroxidase superfamily protein) showed transcriptomic and  
191 proteomic abundance in both stages (Figure 4I).

192 We also highlighted the five most significant abundance shifts in our cross-omics datasets  
193 (Figures 4J, 4K, 4L). Most methylated IDs of both promoter and gene, were unique for Naxos  
194 and Lakoma, respectively (Figure 4J, 4K). Carboxypeptidase A inhibitor domain containing  
195 protein (Soltu.Atl.07\_1G009140) and PATATIN-like protein (Soltu.Atl.08\_0G002410)  
196 decreased their transcriptional activity in Naxos during harvest and post-harvest. Accordingly,  
197 a zinc finger (C2H2 type) family protein (Soltu.Atl.04\_0G006320) gene increased its  
198 expression in both stages (Figure 4J). Naxos cultivar showed decreased genebody methylation  
199 of serine carboxypeptidase-like (Soltu.Atl.05\_2G016570) in harvest, as 4-phosphopantetheine  
200 adenylyltransferase (Soltu.Atl.02\_3G005740) was decreased in both promoter and genebody  
201 at post-harvest (Figures 4J, 4K). It is noticeable that the protein abundance and gene  
202 expression of the potato type II proteinase inhibitor family containing domain  
203 (Soltu.Atl.03\_4G015120) was negatively affected in Naxos at both stages (Figure 4K). Kunitz  
204 family trypsin and protease inhibitor protein (Soltu.Atl.03\_4G015020), as well as trypsin and  
205 protease inhibitor containing domain protein (Soltu.Atl.03\_4G014750), were among the top  
206 differentiated IDs on a transcript level and decreased their expression in Naxos at both stages  
207 (Figure 4K). As for the top differentiated proteins, serine protease inhibitor  
208 (Soltu.Atl.09\_4G017710) decreased in Naxos for both stages, whereas acyl transferase/acyl  
209 hydrolase/lysophospholipase superfamily protein (Soltu.Atl.08\_0G002400) and trypsin and  
210 protease inhibitor containing domain protein (Soltu.Atl.03\_4G014790) increased in Naxos at  
211 harvest (Figure 4K).

### 212 **Triple multi -omics approaches magnify the possibility of tuber biomarkers detection**

213 Aiming to provide a pipeline integrating data from multiple omics layers, we apply analytical  
214 tools, such as correlation downstream analysis and causal models, to identify and characterize  
215 the PGI-driver biomarkers. Initially, Pearson correlation was used to examine the linear  
216 relationship of the consensus gene IDs within methylome (CHH, promoter or genebody),  
217 transcriptome, and proteome (Figure 5A, Tables S10-S11). We then illustrated the changes in

218 tubers of Naxos via heatmap and cluster analysis (Figure 5B), presenting distinct differences  
219 among -omics datasets. Analyzing the outcome in detail, we have focused on clusters with a  
220 steadily increasing pattern across -omics data in both methylome CHH, promoter or gene  
221 body at harvest and post-harvest. For instance, UDP-Glycosyltransferase  
222 (Soltu.Atl.05\_3G001570), Glycosyl hydrolase (Soltu.Atl.03\_2G010490), and zinc finger  
223 (C2H2 type) (Soltu.Atl.04\_0G006320) increased mainly their levels of proteome and  
224 transcriptome in Naxos tubers, with no effect on promoter's methylome, while this pattern  
225 was not observed on gene body methylome CHH-DMR, but in CHG-DMR with 4-alpha-  
226 glucanotransferase (Soltu.Atl.02\_4G000640). In contrast, lipoxygenase  
227 (Soltu.Atl.08\_3G003490) has been found to decrease the levels of methylome promoter,  
228 proteome, and transcriptome in Naxos tubers. Notably, glutathione S-transferase  
229 (Soltu.Atl.09\_0G002590) has been increased CHH-DMR methylation in both promoter and  
230 gene body at harvest followed by a decrease in transcriptome and proteome at both stages  
231 (Figure 5B). Following gene ontology (GO) classification the datasets from CHH-DMR  
232 methylation in promoter or gene body, transcriptome, and proteome have been enriched to  
233 unravel the major groups of genes/proteins that are involved. This approach evidenced that  
234 protein- and ATP- binding were the most enriched molecular functions in the triple datasets  
235 (Figure 5C).

236 In this study, we employed the dynamics of causal models between variables of consensus  
237 genes from the triple datasets to determine possible causal relationships among genes or  
238 proteins IDs. Four causal relationships were determined (three of them V-type). Among them,  
239 the isoflavone reductase-like protein (Soltu.Atl.04\_4G019440) along with the DNA-damage-  
240 repair/ toleration protein DRT100 (Soltu.Atl.11\_2G007320), as well as the chaperone protein  
241 ClpB4 (Soltu.Atl.06\_2G004400) with the L-ascorbate peroxidase (Soltu.Atl.09\_2G005830),  
242 were the cause of the uncharacterized protein LOC102594761 (Soltu.Atl.05\_4G020850) and  
243 the plasma membrane-associated cation-binding protein 1 (Soltu.Atl.10\_2G000120),  
244 respectively (Figure 5D).

#### 245 **Microbials coupled with -omics data as a novel approach to enhance biomarker** 246 **discovery**

247 As a final step of the present work, the PGI-related molecular changes jointly detected by  
248 triple multi -omics analysis (Figures 5, 6) were integrated with metagenomics, enormously  
249 expanding the possibility to identify potential biomarkers in PGI foods. To achieve this, a



250 combination of multi-omics datasets (methylome, transcriptome, and proteome) with the  
251 metagenome dataset, weighted network analysis (WGCNA) was employed. Using this  
252 approach, 30 modules were generated from datasets (Table S12). Initially, we performed a  
253 Pearson correlation analysis (Figure 6A) included all pairwise comparisons of the 30 modules  
254 corresponding to the five datasets (methylome promoter/gene, transcriptome, proteome, and  
255 the microbials; Table S13). This analysis resulted in 232 (53.3% of all comparisons) pairwise  
256 comparisons being higher than 0.5 in absolute value (115 positive and 117 negative  
257 correlations). Thereafter, a correlation network illustration was constructed (Figure 6B). The  
258 edges between nodes (correlations higher than |0.5|), the thickness (absolute value), and the  
259 size of the node (degree of centrality) were incorporated in this network. In the next step, the  
260 positive correlation of two separate groups that included the microbial modules M1 and M2  
261 was determined and marked the solid lines by red and purple color, respectively (Figure 6B).  
262 Then, module eigengenes were used to determine patterns across modules, especially  
263 associated with Naxos. Within each group (M1, M9, M15, M22, M24, M28), (M2, M11,  
264 M12, M17, M25, M27), an increase of eigengenes in Naxos based on  $z$ -score at harvest and  
265 post-harvest, respectively, was evident (Figure 6C, Table S14).

266 To detect pairwise targeted correlations microbial of interest, we focused on the most  
267 abundant microbials (genus levels) of the PGI potatoes (from Naxos) compared to the control  
268 ones (from Lakoma). These included *Neobacillus* from M1 and *Planococcus* from M2. For  
269 both microbial taxa, it should be highlighted that they were found to be dominant and highly  
270 abundant solely in Naxos, regardless the individual field, whilst they were present at very low  
271 abundance in Lakoma. A Pearson correlation analysis was employed based on these two  
272 genera inside each positively correlated group of modules, respectively. Hence, *Neobacillus*  
273 has been positively correlated with 14 transcripts (M9) and seven DNA methylation CHH-  
274 DMR-base genes correspond to four gene bodies (M24) and three promoters (M28), while  
275 *Planococcus* with 45 transcripts (M11 and M12) and one protein (M17).

276 The large number of transcripts associated with these microbial taxa is a controversial issue,  
277 whereas those related to proteins and DNA methylation are considered more trustworthy due  
278 to the higher environmental constancy. In this context, *Neobacillus* is related to  
279 hypermethylation of gibberellin 2-beta-dioxygenase 2-like (Soltu.Atl.05\_2G019380) and  
280 xyloglucan endotransglycosylase protein 23 (Soltu.Atl.03\_4G007570) in gene body and

281 promoter, respectively. Similarly, *Planococcus* is related to the protein of serine/threonine  
282 protein phosphatase 2A regulatory subunit beta-like (Soltu.Atl.04\_3G005110).

283

## 284 **DISCUSSION**

285 Undoubtedly, there is an increasing demand by consumers for reliable labeling of food  
286 products, as well as for strict controls by retailers, manufacturers, and governments  
287 concerning food safety. The development of fast, accurate, and convenient technologies is of  
288 utmost importance to assess and trace the authenticated agricultural products from a certain  
289 terroir (Wei et al., 2022). The emerging -omics technologies including genomics,  
290 epigenomics, transcriptomics and proteomics, and more recent approaches such as  
291 metagenomics have been developed with promising applications towards geographical  
292 origination (Balkir et al., 2021). Specifically, metagenomics represents a useful diagnostic  
293 tool to identify microbial signatures related to natural ecosystems where plants and animals  
294 originate from (Iquebal et al., 2022). Pairing the usual -omic tools of Foodomics with  
295 microbe-based methods such as amplicon metagenomics, represents a novel and promising  
296 technique to improve our understanding on the role of plant-microbe in deciphering plant  
297 performance under distinct terroirs (Nerva et al., 2022). Despite the breakthrough of multi-  
298 omics studies that brought food research into a new era, the association of Food products with  
299 PGI traits has not been conducted yet. Furthermore, to the best of our knowledge, no broad-  
300 scale quantitative and integrative analysis of transcriptomes, epigenomes, and proteomes has  
301 been performed yet, that would enable the application of the ‘Foodomics’ approach in plant-  
302 derived foods. The lack of such studies mostly relies on the difficulties that are raised with the  
303 integration of the multiple -omics approaches due to the need of demanding bioinformatics  
304 tools and mathematical models required for the accurate quantification and characterization of  
305 such large amount of data. In the present study, we achieved the integration of multiple -  
306 omics technologies through the application of analytical tools, such as correlation downstream  
307 analysis and causal models, aiming to the identification and characterization of putative PGI-  
308 driver biomarkers.

309 The transcript expression and protein abundance of the potato grown at different  
310 environments exhibited distinct changes, confirming previous observation that transcriptome  
311 and proteome represents a useful diagnostic tool to identify plant performance under distinct  
312 terroirs (Braconi et al., 2021; Capozzi and Bordoni, 2012; Wei et al., 2022). For instance, the  
313 sucrose synthase protein which catalyzes the conversion of sucrose into glucose and fructose

314 has been found in higher abundance at both stages of Naxos potatoes. This quality trait may  
315 be responsible for the characterization of 'premium quality' in Naxos potatoes, since an  
316 enhanced sucrose synthase activity has been correlated with an increase in starch level and  
317 yield in potatoes (Baroja-Fernández et al., 2009). Another interesting finding is that a Kunitz  
318 trypsin inhibitor, which probably acts as a regulator of endogenous proteases and assists in  
319 defense against pests and pathogens (Bendre et al., 2018), has been revealed to decrease at  
320 both transcript and protein levels through the single and pairwise analysis in Naxos potatoes  
321 (Fig. 3 and 4). By pairing the transcriptomic and epigenomic or proteomic tools with microbe-  
322 based methods, such as amplicon metagenomics, we uncovered that potato tubers cultivated  
323 in the semi-arid region of the island of Naxos, which represents a unique Mediterranean  
324 agroecosystem, recruit more beneficial microorganisms, possibly to cope with the unfavorable  
325 environmental conditions (Leontidou et al., 2020). For example, hypermethylation of  
326 xyloglucan endotransglycosylase protein 23 (modify cell wall (Eklöf and Brumer, 2010)) and  
327 gibberellin 2-beta-dioxygenase 2-like (catalyzes gibberellin (Santner and Estelle, 2009) that  
328 promoting sprouting in potato tubers (Sonnewald and Sonnewald, 2014)) could be driven by  
329 *Neobacillus*, which was found to be a dominant and highly abundant species being present  
330 only in Naxos tubers (Fig. 6c). These results are in accordance with the notion that soil  
331 microbial biogeography is predominantly governed by regional soil properties, unique for  
332 each terroir (Fierer and Jackson, 2006; Genitsaris et al., 2020). It is interesting to note that a  
333 key microbe like as *Neobacillus* was preserved during post-harvest storage, thus representing  
334 an excellent tool towards authenticating these PGI products (Fig. 1 and 6). The rhizosphere of  
335 potatoes has been previously found to be a rich source of *Bacillus* strains possessing plant-  
336 growth-promoting properties (Calvo et al., 2010), however the exact role of such strains in  
337 improving plant performance, quality or shelf-life remains elusive.

338 Most authentication techniques for food products have focused on species or varietal  
339 identification, as well as on the chemical composition of processed foods (Sentandreu and  
340 Sentandreu, 2011). Yet, quality traits of plant products can also be determined by cultivation  
341 conditions (climate, location, management systems, soil conditions etc.) (Posner et al., 2008).  
342 Importantly, cultivation conditions have been shown to induce DNA methylome changes in a  
343 wide variety of plants (Lira-Medeiros et al., 2010; Verhoeven et al., 2010). DNA methylome  
344 reflects the potato tubers' perspective of the growing environment, therefore can serve as an  
345 appealing diagnostic biomarker (epimarker) tool for geographical origin of otherwise identical  
346 crops (López and Wilkinson, 2015). Our findings demonstrated that hypermethylation of

347 glutathione *S*-transferase (enzymes that is induced by stress (Roxas et al., 1997)) at the gene  
348 body and promoter leads to a decline of both protein and transcript levels in Naxos tubers  
349 (Fig. 5b). Moreover, the causal analysis revealed a V-type connection, where the cause is the  
350 (UP) LOC102594761 (Figure 5D) driving us to conclude that this ID is crucial and needs  
351 further analysis to understand the proposed connection about hypermethylation of isoflavone  
352 reductase (involved in secondary metabolites biosynthesis (Shoji et al., 2002)), DNA-damage-  
353 repair/ toleration protein DRT100 (protect DNA under stress (Fujimori et al., 2014)) and  
354 uncharacterized protein (UP) LOC102594761 combined with a decrease in transcripts and  
355 proteins at harvest and an increase at post-harvest in Naxos (Figure 5D).

356 The results from this study are of interest also beyond geographical origin studies. For  
357 example, putative epimarkers such as the hypermethylation of DETOXIFICATION 18  
358 (Soltu.Atl.10\_4G001390) in Naxos, could be used not only to tag cultivation system and  
359 geographical region of origin, but also in more nuanced applications to satisfy the ever-  
360 increasing demand of the consumers for high quality food products. These could be either in  
361 identifying the tissue of origin in plant products (since different plant tissues have diverse  
362 methylation profiles) or other factors affecting post-harvest food quality such as storage,  
363 transport, and processing conditions (López and Wilkinson, 2015). Collectively, this  
364 innovative broad-scale quantitative and integrative work validated the expression of key gene  
365 markers by their protein abundance and identified putative epimarkers as well as key  
366 microbes to authenticate a popular PGI product such as Naxos potato. At last, but not at least  
367 a novel pipeline was developed towards the establishment of breakthrough approaches  
368 towards food characterization and authentication.

### 369 **Limitations of the study**

370 Our study represents the first multi-omic approach integrating the transcriptome, the  
371 proteome, and the epigenome, with the metagenome of a potato of Protected Geographical  
372 Indication, to identify terroir-specific “footprints”. However, as the biomarkers identified  
373 following causal-model analysis entirely depend on computational modeling, further  
374 experimentation is necessary to validate their biological significance and causality, as well as  
375 their stability and persistence over years or different geographic regions. On a bioinformatic  
376 note, the lack of polyploid specific genome-guided assemblers able to use more than one  
377 reference genome, such as in the case of tetraploid potato, may lead to missing alternative  
378 homologous sequences, limiting the potential for in-depth downstream transcriptomics

379 analysis. Conclusively therefore, there are still-existing challenges, both experimental and  
380 methodological, in capturing dominant terroir-originated marks to diversify and authenticate  
381 Protected Geographical Indication agricultural products that are stable across growing seasons  
382 and post-harvest storage.

383

## 384 **Materials and methods**

### 385 *Potato cultivation and experimental sites*

386 Potatoes, cultivar Spunta (Oldenburger, Assem, Holland), were cultivated in two regions of  
387 Greece, i.e., Naxos Island, Aegean Sea, Greece, and Lakoma, Chalkidiki, North Greece  
388 (Figure 1A, Table S15), following the same experimental and cultivation protocol  
389 (composition analysis of potatoes provided in Table S16). The soils in Naxos were  
390 characterized as loamy sand or sandy loam (clay content, 13%; sand content 66%), with  
391 relatively high organic matter content (2.1%), and pH 7.6 whereas the soils in Lakoma were  
392 characterized as clay loam (clay content, 27%; sand content, 45%), with lower organic matter  
393 content (1.4%) and pH 7.9. Soil cultivation, fungicide treatments and water application during  
394 dry periods, were carried out in accordance with the common potato production schemes in  
395 Greece. During crop growth, plants were regularly monitored for the occurrence of stress,  
396 pests, and diseases. The harvest of the tubers was performed early in June 2021 for both  
397 collection sites, after foliage desiccation. All tubers were placed in sterile bags at 10 °C and  
398 carried to the lab, within 12 hours. Samples for subsequent analyses were snap-frozen in  
399 liquid nitrogen and stored at -80 °C. At harvest, there were eight and six samples (pooled  
400 tubers from an individual plant, with three biological replicates for each sample),  
401 corresponding to different collection sites of Naxos and Lakoma, respectively. The exact  
402 sampling locations are provided in Table S15. For the post-harvest experiment, tubers were  
403 stored at 10 °C for one-month prior subsequent analyses.

### 404 *Transcriptome and whole-genome bisulfite sequencing*

#### 405 *Library construction*

406 Total RNA of pooled tubers from the eight collection sites of Naxos, and the six collection  
407 sites of Lakoma (Table S15), with three biological replicates each, was isolated using  
408 TRIzol™ reagent (Invitrogen, CA, USA), followed by rRNA depletion and DNaseI treatment  
409 (Qiagen, Hilden, Germany). For each RNA sample at harvest and at post-harvest, a paired-

410 end strand-specific Tru-seq compatible library was constructed following manufacturer's  
411 instructions.

412 High quality genomic DNA was isolated from the same samples as previously described for  
413 the RNASeq experiment, using the CTAB method (Doyle J. J. and Doyle J. L., 1990) to  
414 perform whole-genome bisulfite sequencing (WGBS) at Beijing Novogene Technology Co.,  
415 Ltd. with target sequencing depth at 30×. The isolated DNA was fragmented by sonication to  
416 200–300 bp using a Covaris S220 (Covaris, Woburn, MA, USA), followed by end repair and  
417 A-ligation. After ligation to cytosine-methylated barcodes, the DNA fragments were treated  
418 twice with bisulfite using an EZ DNA Methylation-Gold™ Kit (Zymo Research, Orange, CA,  
419 USA). The libraries were then prepared according to the Illumina standard DNA methylation  
420 analysis protocol.

421 RNA-seq and WGBS libraries were sequenced (Paired-End, 150bp) on the Illumina Novaseq  
422 6000 platform (Illumina, CA, USA) (Novogene, Beijing, China).

#### 423 *RNA-seq data analysis*

424 All data generated were aligned to the tetraploid *Solanum tuberosum* reference genome  
425 (Atlantic v2.0) via Hisat2 applying the default parameters. Quantification of raw read  
426 counts/gene was conducted with HTSeq v0.11.1 ([http://www-  
427 huber.embl.de/users/anders/HTSeq/](http://www-huber.embl.de/users/anders/HTSeq/)), selecting the '-s reverse -type=gene' option. Transcripts  
428 Per Million (TPM) was used for the normalization of raw reads. Data were then transformed  
429 to log<sub>2</sub> and scaled (z-score: mean center divided by standard deviation). Principal Component  
430 Analysis was performed for each sample and treatment) using the normalized data with the  
431 function 'pcomp' in R (version 4.1.0).

#### 432 *Whole-genome bisulfite sequencing (WGBS) data analysis*

433 FastQC (fastqc\_v0.11.5) was used to perform basic statistics on the quality of raw reads.  
434 These sequences, produced by the Illumina pipeline in FASTQ format, were pre-processed  
435 through Trimmomatic (Trimmomatic-0.36) software using the parameter  
436 (SLIDINGWINDOW: 4:15; LEADING:3; TRAILING:3; ILLUMINACLIP: adapter.fa: 2: 30:  
437 10; MINLEN:36). The low quality (< Q30) data was filtered out, and the filtered high quality  
438 sequencing data was mapped to the tetraploid *Solanum tuberosum* reference genome (Atlantic  
439 v2.0) by Bismark v0.19.0 (Krueger and Andrews, 2011).

440 The Bioconductor package DSS (Dispersion Shrinkage for Sequencing) was used to identify  
441 differentially methylated regions (DMRs) following default parameter settings with a reduced  
442 smoothing size (smoothing span  $\square = \square 200$ ). According to the distribution of DMRs throughout  
443 the genome, genes related to DMRs were defined as DMR-associated genes whose gene body  
444 region (from TSS to TES) or promoter region (upstream 2  $\square$  kb from the TSS) overlapped with  
445 DMRs.

#### 446 *Quantitative real time (qRT) PCR assay*

447 Total RNA isolated from aliquots of the sequenced samples was reverse transcribed to cDNA  
448 using SuperScript™ First-Strand Synthesis System (Invitrogen™ Thermo Fisher Scientific,  
449 Inc.). Gene expression profiles of ten genes (Table S17), randomly picked from the dataset,  
450 were analyzed by Quantitative real time PCR (qRT PCR) using Luna® Universal qPCR  
451 Master Mix (New England BioLabs) in a QuantStudio® 5 Real-Time PCR System (Thermo  
452 Fisher Scientific) according to (Xanthopoulou et al., 2021). For gene expression  
453 normalization, *EF-1a* was used as reference gene (Tang et al., 2017).

#### 454 *Proteomics*

##### 455 *Bottom-up proteomic sample preparation*

456 The protein extracts, obtained from three representative collection sites in Naxos and three in  
457 Lakoma, with three biological replicates each one at harvest and at post-harvest, were  
458 processed according to the sensitive Sp3 protocol. The cysteine residues were reduced in 100  
459 mM DTT and alkylated in 200 mM iodoacetamide (Acros Organics). 20  $\mu$ g of beads (1:1  
460 mixture of hydrophilic and hydrophobic SeraMag carboxylate-modified beads, GE Life  
461 Sciences) were added to each sample in 50% ethanol. Protein clean-up was performed on a  
462 magnetic rack. The beads were washed twice with 80% ethanol and once with 100%  
463 acetonitrile (Fisher Chemical). The captured-on beads proteins were digested overnight at  
464 37°C under vigorous shaking (1200 rpm, Eppendorf Thermomixer) with 1  $\mu$ g Trypsin/LysC  
465 (MS grade, Promega) prepared in 25 mM Ammonium bicarbonate. The next day, the  
466 supernatants were collected, and the peptides were purified using a modified Sp3 clean up  
467 protocol and finally solubilized in the mobile phase A (0.1% Formic acid in water), sonicated  
468 and the peptide concentration was determined through absorbance at 280nm measurement  
469 using a nanodrop instrument.

##### 470 *LC-MS/MS Analysis*

471 Samples were analyzed on a liquid chromatography tandem mass spectrometry (LC-MS/MS)  
472 setup consisting of a Dionex Ultimate 3000 nanoRSLC coupled inline with a Thermo Q  
473 Exactive HF-X Orbitrap mass spectrometer. Peptidic samples were directly injected and  
474 separated on a 25 cm-long analytical C18 column (PepSep, 1.9 $\mu$ m<sup>3</sup> beads, 75  $\mu$ m ID) using  
475 an one-hour long run, starting with a gradient of 7% Buffer B (0.1% Formic acid in 80%  
476 Acetonitrile) to 35% for 40 min and followed by an increase to 45% in 5 min and a second  
477 increase to 99% in 0.5min and then kept constant for equilibration for 14.5min. A full MS  
478 was acquired in profile mode using a Q Exactive HF-X Hybrid Quadrupole-Orbitrap mass  
479 spectrometer, operating in the scan range of 375-1400 m/z using 120K resolving power with  
480 an AGC of 3x 10<sup>6</sup> and maximum IT of 60ms followed by data independent acquisition  
481 method using 8 Th windows (a total of 39 loop counts) each with 15K resolving power with  
482 an AGC of 3x 10<sup>5</sup> and max IT of 22ms and normalized collision energy (NCE) of 26.

#### 483 *Proteomic Data Analysis*

484 Orbitrap raw data from the 35 protein samples (one has failed) were analyzed in DIA-NN 1.8  
485 (Data-Independent Acquisition by Neural Networks) through searching against the Atlantic  
486 v2.0 ([http://spuddb.uga.edu/phased\\_tetraploid\\_potato\\_download.shtml](http://spuddb.uga.edu/phased_tetraploid_potato_download.shtml)) using the library free  
487 mode of the software, allowing up to two tryptic missed cleavages and a maximum of three  
488 variable modifications/peptide. A spectral library was created from the DIA runs and used to  
489 reanalyze them (double search mode). DIA-NN search was used with oxidation of methionine  
490 residues and acetylation of the protein N-termini set as variable modifications and  
491 carbamidomethylation of cysteine residues as fixed modification. N-terminal methionine  
492 excision was also enabled. The match between runs feature was used for all analyses and the  
493 output (precursor) was filtered at 0.01 FDR and finally the protein inference was performed  
494 on the level of genes using only proteotypic peptides. The generated results were processed  
495 statistically and visualized in the Perseus software (1.6.15.0).

#### 496 *Metagenomics*

##### 497 *DNA Extraction, Amplification, and Sequencing*

498 Nearly 200 grams of 72 samples obtained from potato tuber-sphere at harvest or after one-  
499 month post-harvest storage, from all the individual collection sites (Table S15), was used for  
500 the microbial mapping of the two different regions. High quality DNA was isolated with the  
501 DNeasy PowerSoil Pro Kit (QIAGEN, Carlsbad, USA), following the manufacturer's  
502 instructions and stored at -80°C. Amplification of the 16S rRNA gene was performed using



503 an Applied Biosystems® QuantStudio® 5 Real-Time PCR System (Thermo Fischer  
504 Scientific, Waltham, MA, USA), using a LongAmp Hot Start Taq 2x Master Mix (M0533S,  
505 New England Biolabs), and 16S barcoded primers.

506 The 16S Barcoding Kit 1-24 (SQK-16S024, Oxford Nanopore Technologies, UK) was used  
507 for sequencing the 16S ribosomal gene and creating the libraries. PCR products were purified  
508 with Agecount AMPure XP beads (Beckman Coulter, USA), whilst the quantification was  
509 performed using Qubit 4 Fluorometer and the dsDNA HS Assay Kit (Thermo Fisher  
510 Scientific, USA). The 72 libraries were created in accordance with the manufacturer's  
511 instructions and loaded on a MinION R9.4.1 flow cell (FLO-MIN106) on the MinION Mk1C  
512 (Oxford Nanopore Technologies, UK). For data acquisition, MINKNOW software ver. 1.11.5  
513 (Oxford Nanopore Technologies) was employed.

#### 514 *Sequencing Data Processing and Analysis*

515 MinION™ sequence reads (i.e., FAST5 data) were converted into FASTQ files by using  
516 Guppy software (version 5.0.17) (Oxford Nanopore Technologies). To remove reads derived  
517 from humans, EPI2ME 16S pipeline software was used. The unmatched reads to the human  
518 genome were considered as reads obtained from bacteria.

519 Bacterial communities were identified through the same software (EPI2ME), which is based  
520 on Nextflow (di Tommaso et al., 2017), that enables scalable and flexible scientific analysis  
521 (Delegou et al., 2022). In order to classify the DNA sequences from microbial samples, the  
522 Centrifuge software was used (Kim et al., 2016), which is based on the Burrows-Wheeler  
523 Transformation (BWT) and the Ferragina-Manzini (FM) index, that enables timely and  
524 precise metataxonomic analysis. Operational taxonomic units (OTU tables) by matching the  
525 NCBI taxa IDs to lineages and counting the number of reads per NCBI taxa ID.

526 Alpha – diversity was calculated, using the “vegan” package, while beta – diversity was  
527 assessed, applying the “vegan” and “betapart” packages (Baselga and Orme, 2012), all in R  
528 studio software. Principal component analysis (PCA) and Non-metric Multi-dimensional  
529 Scaling (NMDS) were conducted via “vegan” (<https://github.com/vegandevs/vegan>) and  
530 “graphics” (<https://rdrr.io/r/graphics/graphics-package.html>) packages. In addition, analysis of  
531 similarities (ANOSIM) was also performed, using the vegan package. In order to run the  
532 hierarchical clustering algorithm, multiple dendrograms by chaining were performed, using  
533 the “tidyverse” (<https://www.tidyverse.org/>) and “dendextend” packages (Galili, 2015). A

534 heatmap based on the relative abundance of OTUs was generated using the “gplots” package  
535 (<https://cran.r-project.org/web/packages/gplots/index.html>), while stacked bar charts were  
536 performed, integrating the top 10 most abundant genera and species between tuber samples at  
537 harvest and at post-harvest. Finally, the linear discriminant analysis (LDA) effect size (LEfSe)  
538 analysis was conducted (Segata et al., 2011) via Galaxy software  
539 (<https://huttenhower.sph.harvard.edu/galaxy/>), in an effort to characterize the microbial  
540 variance between the unique categories and determine possible biomarkers for each one.

#### 541 *Multi-omics analysis*

##### 542 *Dual approach*

543 The analysis was separately performed for the pairs corresponding to the same gene IDs in  
544 transcriptome and methylome promoter or genebody, and transcriptome/proteome. Only pairs  
545 which exhibited valid values for all tissues at both levels were considered. Of these, for the  
546 transcript/protein, only pairs with values greater than 1 in at least one out of the four groups at  
547 both transcriptomic and protein levels were further assessed (the methylome values were  
548 between 0 and 1), resulting in 1247 transcript/methylome promoter pairs, 1206  
549 transcript/methylome gene pairs, and 1033 transcript/protein pairs. The Pearson coefficient  
550 was used to assess the correlation in all three dual comparisons, across and between groups,  
551 respectively. The ranking of the absolute mean intensity differences in pairwise comparisons  
552 (Naxos vs Lakoma (Harvest), Naxos vs Lakoma (Post-Harvest)) was used as well.

##### 553 *Triple approach*

554 The Pearson coefficient was further employed to assess the correlation between tissues for the  
555 triplets corresponding to consensus gene IDs in methylome promoter/transcriptome/proteome  
556 (n=49), and methylome genebody/transcriptome/proteome (n=38). Only triplets with valid  
557 values for the stages and areas were considered, which exhibited values greater than 1 in at  
558 least one out of the stages or areas at both transcriptomic and protein levels. Next, the focus  
559 was in identifying causal relations between methylome/transcriptome/proteome triplets. To  
560 this end, the constrained-based PC algorithm, was employed (“pcalg” R package,  
561 <https://cran.r-project.org/web/packages/pcalg/index.html>), which is used to estimate the  
562 causal structure induced by a causal Bayesian network. For each pair of variables (X, Y) in a  
563 dataset, the PC algorithm evaluates their independence, conditioning on all subsets of all the  
564 remaining variables. If their association is persistent, it is considered to be causal. The output  
565 is a network represented by a Markov equivalence class of the Directed Acyclic Graph

566 (DAG), with a structure consistent with the results of the tests of independence. It is assumed  
567 that causal sufficiency holds<sup>2</sup>, which implies that for every pair of measured variables, all  
568 their consensus direct causes are also measured. A directed edge between X and Y exists, if  
569 and only if, the variables are conditionally dependent given S, for all possible subsets S of the  
570 remaining nodes. In particular, the “pc” R function was used to estimate the equivalence class  
571 of the DAG, under the Markov assumption that the distribution of the observed variables is  
572 faithful to a DAG<sup>3</sup>. All genes exhibited continuous values, thus, the function “gaussCItest”  
573 was employed to perform the conditional independence tests.

#### 574 *Dataset approach*

575 For each omics dataset (and microbials), weighted gene co-expression network analysis  
576 (WGCNA) was employed (“WGCNA” package in R,  
577 <https://horvath.genetics.ucla.edu/html/CoexpressionNetwork/Rpackages/WGCNA/>), to  
578 identify data clusters (modules) across areas and stages. The “blockwiseConsensusModules”  
579 function was used with minimum module size=30, module detection sensitivity=2, and cut  
580 height for module merging=0.25). Next, the eigengenes of the modules were used to assess  
581 the correlation among all modules. Module eigengenes are the module representatives and  
582 defined as the first principal component of the expression matrix for each module. A module  
583 eigengene correlation network was developed as well, with nodes representing the modules,  
584 and edges representing all the correlations between the nodes with absolute value higher than  
585 0.5. All the analyses were performed with R Version 4.1.0.

#### 586 **Data availability**

587 Raw data of RNASeq, Bisulfite-Seq and Metagenome were deposited in the National Centre  
588 for Biotechnology Information (NCBI) Sequence Read Archive (SRA) under BioProject  
589 accession numbers: PRJNA855343, PRJNA855343 and PRJNA854325, respectively. The  
590 mass spectrometry proteomics data have been deposited to the ProteomeXchange Consortium  
591 via the PRIDE partner repository (Perez-Riverol et al., 2022) with the dataset identifier  
592 PXD035074.

#### 593 **Acknowledgements**

594 This research was funded by European Regional Development Fund (ERDF), through the  
595 Operational Program “Southern Aegean” 2014–2020, entitled “Enhancement of quality and  
596 nutritional traits of Naxos potatoes using omics-technologies. Acronym: GrEaTest-Potatoes”

597 (0040991). The implementation of the doctoral thesis was co-financed by Greece and the  
598 European Union (European Social Fund-ESF) through the Operational Programme «Human  
599 Resources Development, Education and Lifelong Learning» in the context of the Act  
600 “Enhancing Human Resources Research Potential by undertaking a Doctoral Research” Sub-  
601 action 2: IKY Scholarship Programme for PhD candidates in the Greek Universities. We  
602 acknowledge support of this work by the project “The Greek Research Infrastructure for  
603 Personalised Medicine (pMedGR)” (MIS 5002802) which is implemented under the Action  
604 “Reinforcement of the Research and Innovation Infrastructure”, funded by the Operational  
605 Programme ‘Competitiveness, Entrepreneurship and Innovation’; (NSRF 2014-2020) and co-  
606 financed by Greece and the European Union (European Regional Development Fund).

607

#### 608 **Authors contribution**

609 I.G. and I.M. conceived and designed the experiment; I.G and I.M planned the structure of the  
610 paper; AB and MM prepared the first draft manuscript; A.B., C.B., M.S., G.S, T.M. and M.G.  
611 analyzed the data; MG carried out the causal model analysis; A.B., M.M., A.D., M.S., G.T.,  
612 C.S., A.X., G.S., I.G., L.A., A.M., I.N-O., G.T., I.F. and C.B. contributed to data acquiring.  
613 All authors contributed to consensus results interpretation and revised the final manuscript.

614

#### 615 **Declaration of interests**

616 The authors declare that they have no competing interest.

617

618

#### 619 **Figures**

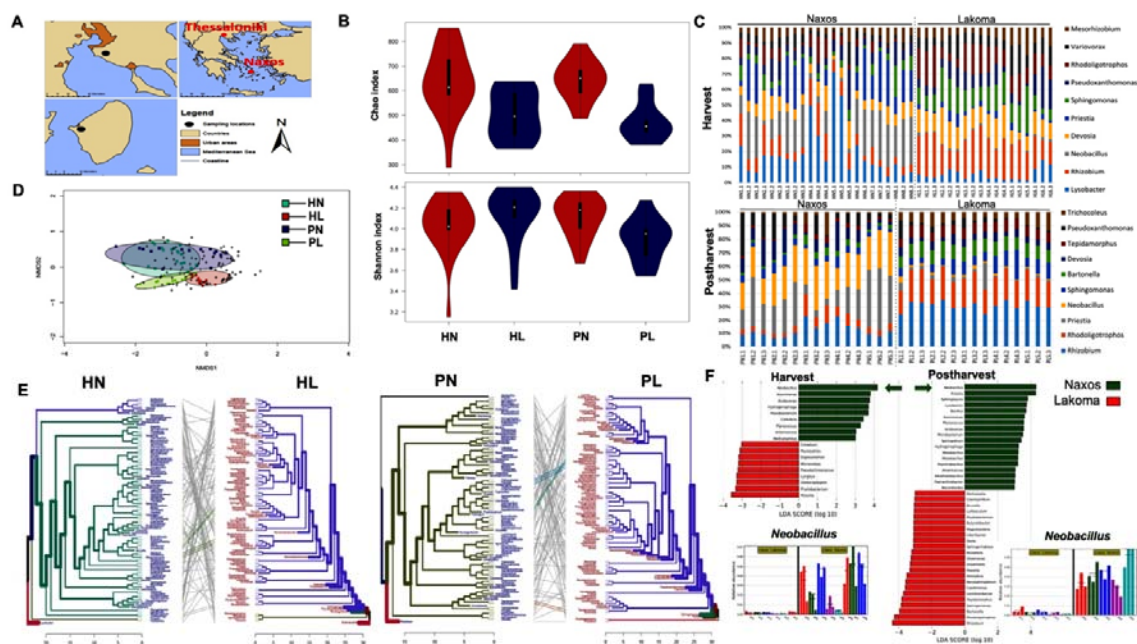

620

621 **Figure 1.** (A) Sampling locations of tubers in Naxos (PGI potatoes) and Lakoma (control  
 622 potatoes). (B) Box plots of alpha-diversity (Chao and Shannon indices) of microbiome  
 623 residing in the tubers from the two regions, at harvest and post-harvest. (C) Distribution of the  
 624 top 10 most abundant taxa of tubers microbiota at the level of genus. (D) Microbiome profiles  
 625 in the tubers obtained from the two regions analyzed by NMDS using the Bray–Curtis  
 626 distance matrix. (E) Tanglegrams showing concordance between bacterial dendrograms based  
 627 on community similarities (Bray–Curtis distance) derived from 16S rRNA gene sequences  
 628 from tubers of the two regions. (F) Histogram of LDA value distribution of taxa at the genus  
 629 level with significant differences in abundance between groups N: Naxos; L: Lakoma; H:  
 630 Harvest; P: Post-harvest. Data obtained from [Table S1](#).

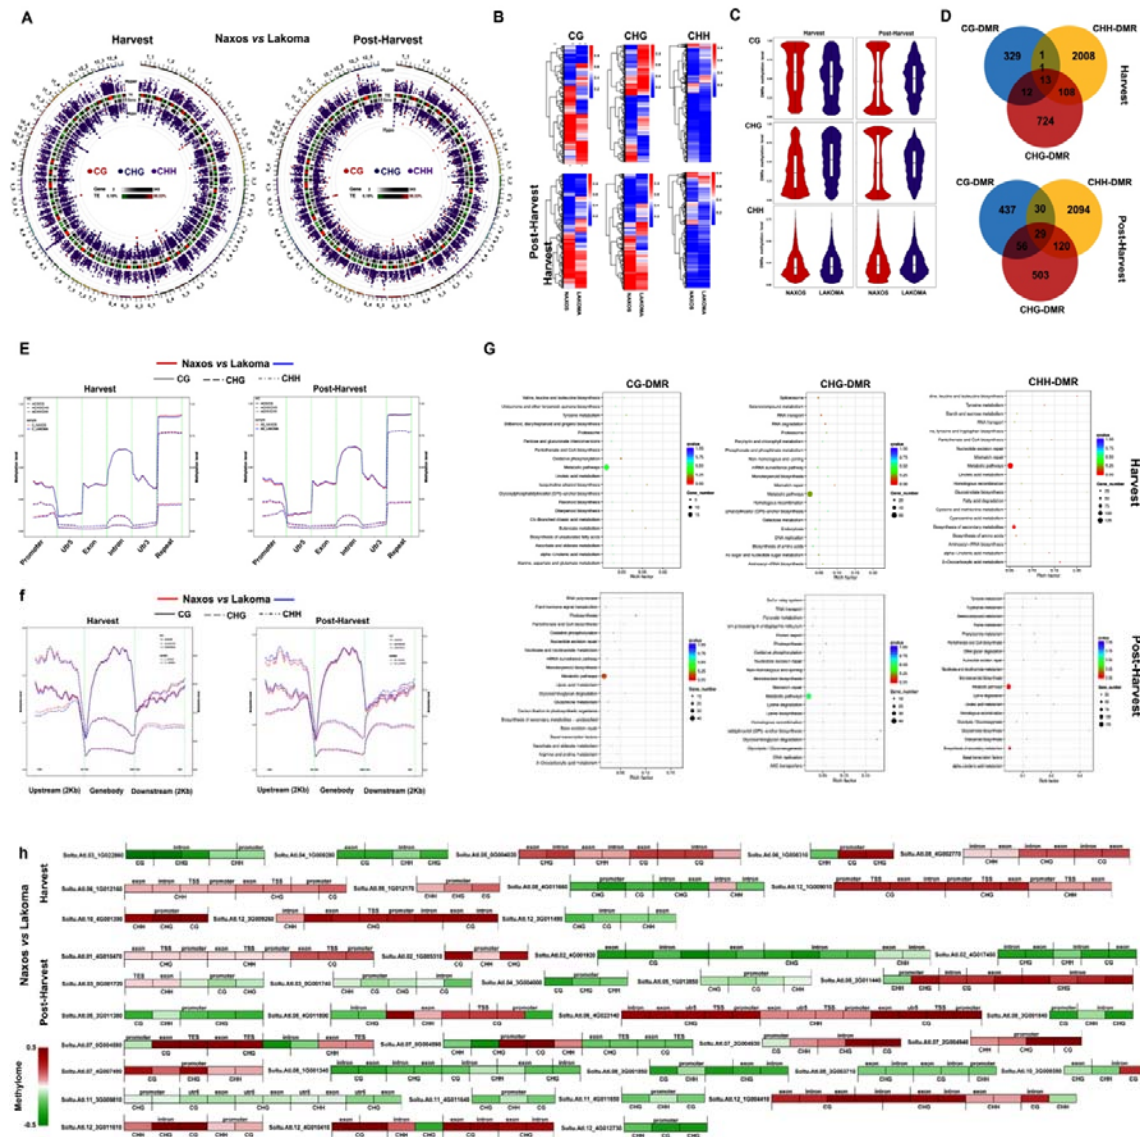

631

632 **Figure 2.** Differential methylation region (DMR) of the tubers harvested from Naxos (PGI  
 633 potatoes) and Lakoma (control potatoes), at harvest and at post-harvest. **(A)** Circos plot for  
 634 DMR condition in three contexts (CG, CHG, CHH). The circos plot represents (from outside  
 635 to inside): (i) Hyper DMR statistical value:  $\log_5$  (areaStat); the higher and bigger the point,  
 636 the larger differences between two groups. (ii) TE, the heatmap of percentage of repeat  
 637 element. (iii) Heatmap of gene density. (iv) Hypo DMR statistical value:  $\log_5$  (areaStat); the  
 638 higher and bigger the point, the larger differences between two groups. **(B)** Cluster heatmap  
 639 for DMR methylation level in three contexts (CG, CHG, CHH). The x-axis is the comparison  
 640 group name, the y-axis is the methylation level and cluster results. **(C)** Violin plot for DMR  
 641 methylation level in three contexts (CG, CHG, CHH). The x-axis is the comparison group  
 642 name, the y-axis is the methylation level. **(D)** Venn plot of DMGs in three contexts (CG,  
 643 CHG, CHH). **(E)** Methylation level distribution at functional genetic elements in three  
 644 contexts (CG, CHG, CHH). The x-axis is the functional genetic elements the y-axis is the  
 645 methylation level. Left label is methylation level in non-CG context; the right label is  
 646 methylation level in CG context. **(F)** Methylation level distribution at up/downstream 2kb  
 647 and gene body in all three contexts (CG, CHG, CHH). The x-axis is the functional genetic

648 elements, the y-axis is the methylation level. Left label is methylation level in non-CG  
 649 context, the right label is methylation level in CG context. (G) KEGG enrichment scatter plot  
 650 for DMR genes in all three contexts (CG, CHG, CHH). The x-axis represents Rich factor, and  
 651 the y-axis represents pathway name. The size of points stand for DMR-related genes counts  
 652 and the colors stand for different q-values range. (H) Heatmap of DMGs genes in all three  
 653 contexts (CG, CHG, CHH). Red indicates hypermethylation and green hypomethylation in  
 654 Naxos. Data obtained from [Table S2](#).

655

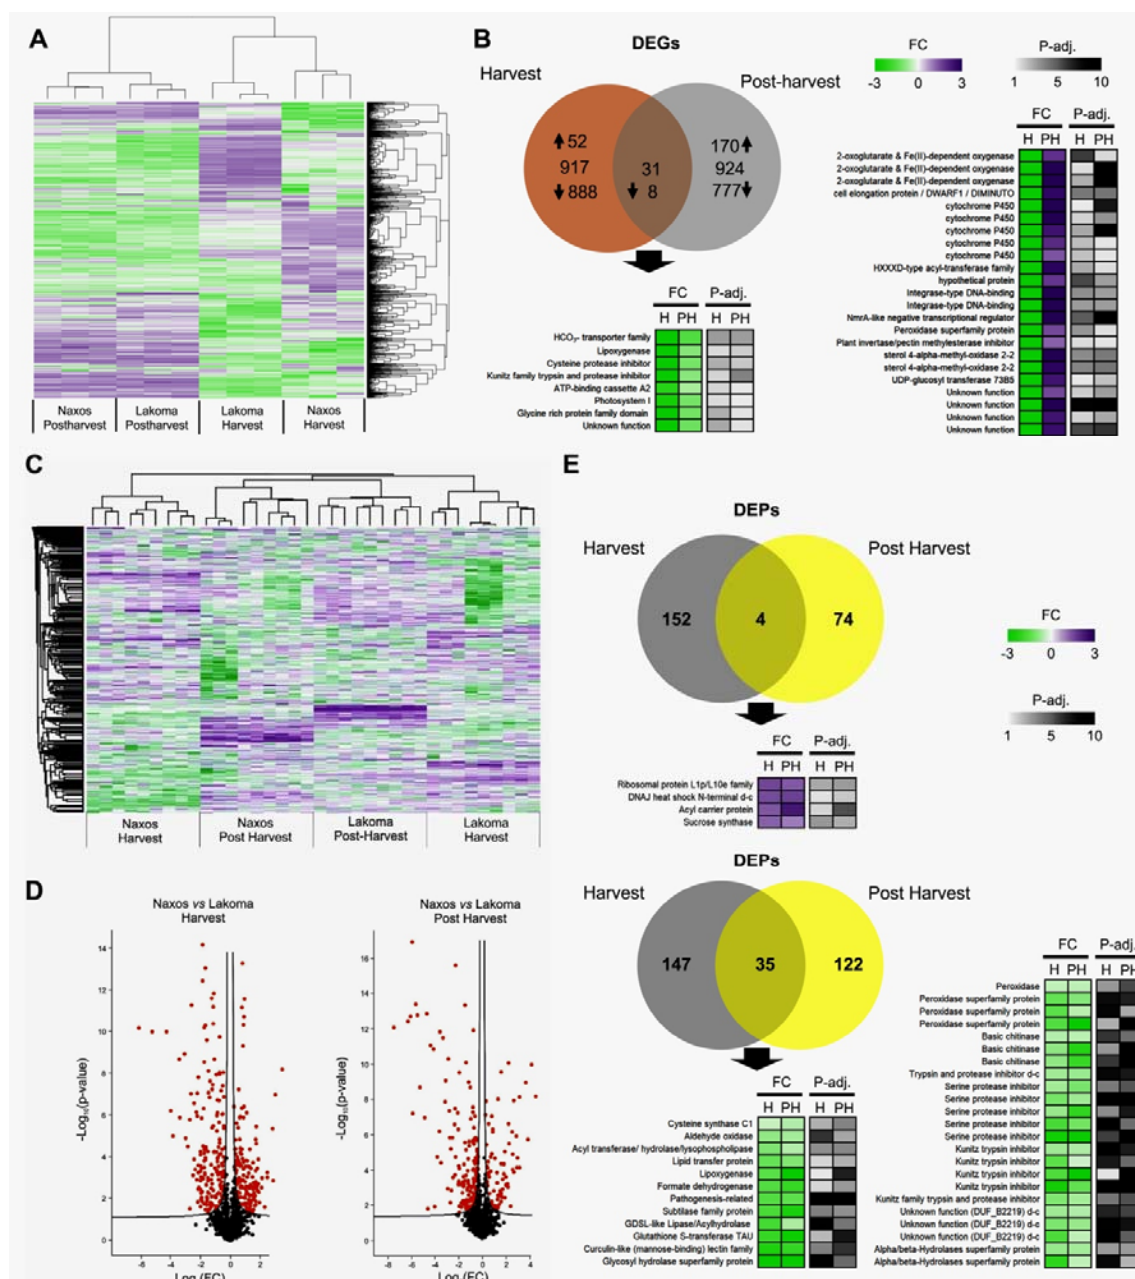

656

657 **Figure 3.** Transcriptome and proteome profiles of tubers in the regions of Naxos (PGI  
 658 potatoes) and Lakoma (control potatoes). (A) Hierarchical cluster analysis of transcriptomic  
 659 data in tubers of two regions at harvest and at post-harvest. (B) Venn diagrams of

660 differentially expressed genes (DEGs) between Naxos and Lakoma at harvest (H) and post-  
 661 harvest (PH). For the common DEGs between Naxos and Lakoma at the two stages, heatmaps  
 662 representing the fold change (FC) in FPKM values of the up- and down-regulated genes at H  
 663 and at PH are also provided. (C) Hierarchical cluster analysis of proteomic data in tubers of  
 664 the two regions at H and at PH. (D) Volcano plots of Lakoma vs Naxos at H and PH. (E)  
 665 Venn diagrams of differentially expressed proteins (DEPs) between Naxos and Lakoma at H  
 666 and at PH. Heatmaps of the commonly increasing or decreasing DEPs in Naxos vs Lakoma  
 667 are also provided. Data obtained from [Table S4-S5](#).

668

669

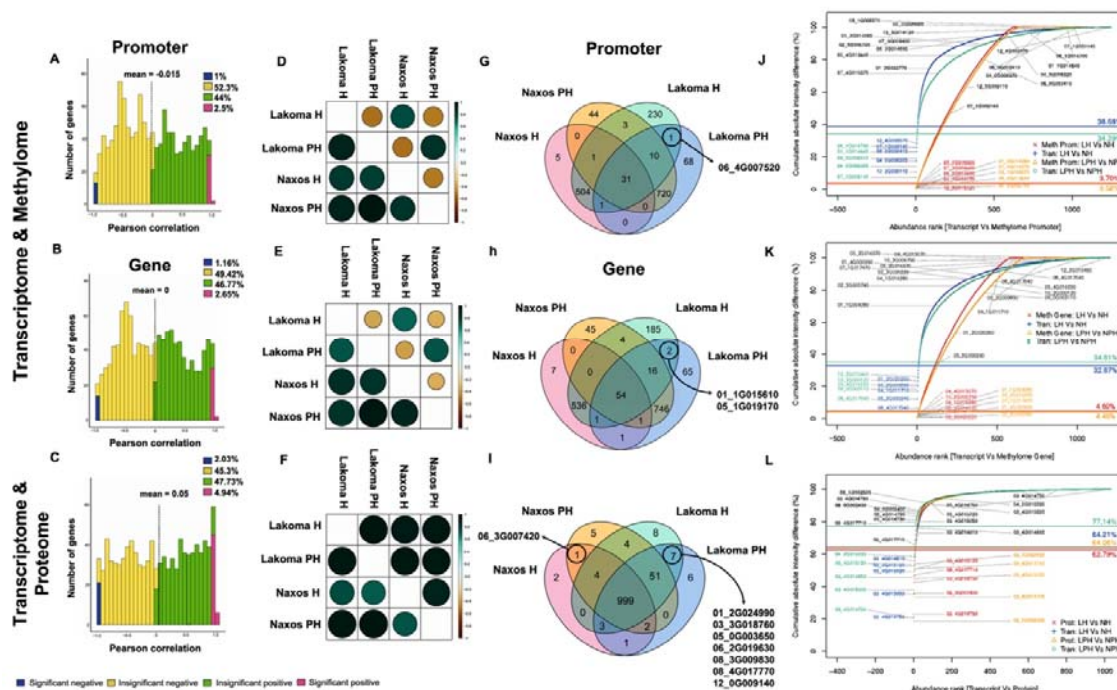

670

671 **Figure 4.** Pairwise transcriptome-based co-expression analysis across methylation,  
 672 transcriptome and proteome datasets. (A, B, C) Pearson correlation values' distribution for  
 673 each omic dataset integration. Methylation-to-transcriptome Pearson correlation heatmaps for  
 674 (D) promoter (E) gene and (F) transcriptome-to-proteome Pearson correlation heatmap. Venn  
 675 diagrams of each integrated analysis for transcriptome-to-promoter methylation (G), gene  
 676 body methylation (H) and proteome (I). Intensity plots displaying significant cumulative  
 677 difference between Naxos and Lakoma in both stages based on transcriptome-promoter  
 678 methylation (J), transcriptome-gene methylation (K) and transcriptome-proteome (L)  
 679 consensus dataset. H: Harvest; PH: Post-harvest. Data obtained from [Supplementary Tables](#)  
 680 [6-9](#).

681

682



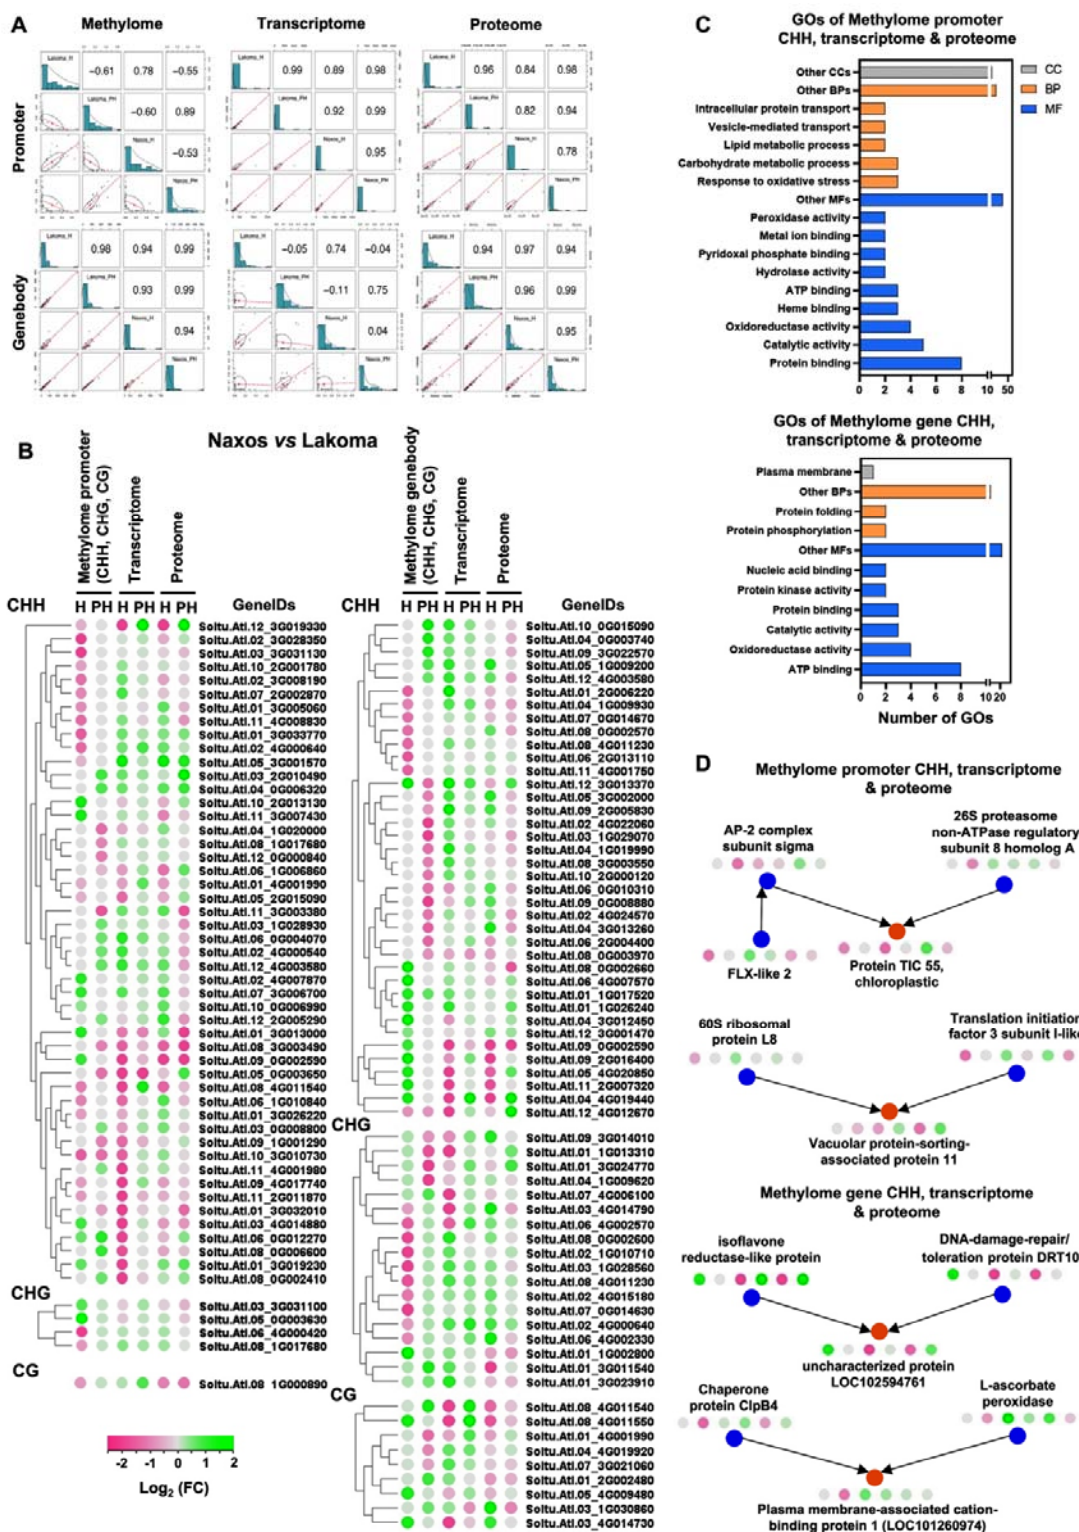

683

684 **Figure 5.** Methylome- (promoter / gene body), transcriptome-, and proteome-based  
 685 interactions of tubers in the regions of Naxos and Lakoma at harvest (H) and post-harvest  
 686 (PH). (A) Pearson coefficient was calculated to assess the correlation of the consensus gene  
 687 IDs in methylome, transcriptome, and proteome only in triplets with values greater than 1  
 688 within transcriptomic and proteomic data. (B) Heatmap and clustering of gene IDs from

689 merged datasets of methylome promoter or genebody, transcriptome, and proteome, in the  
 690 basis of CHH-DMR, CHG-DMR, and CG-DMR. (C) Gene ontology (GO) enrichment  
 691 analysis of methylome promoter (n=49, CHH) or gene body (n=38, CHH), transcriptome, and  
 692 proteome. (D) A causal Bayesian network was constructed to detect causality among  
 693 variables of -omics datasets with consensus gene IDs. Data obtained from [Tables S10-S11](#).  
 694

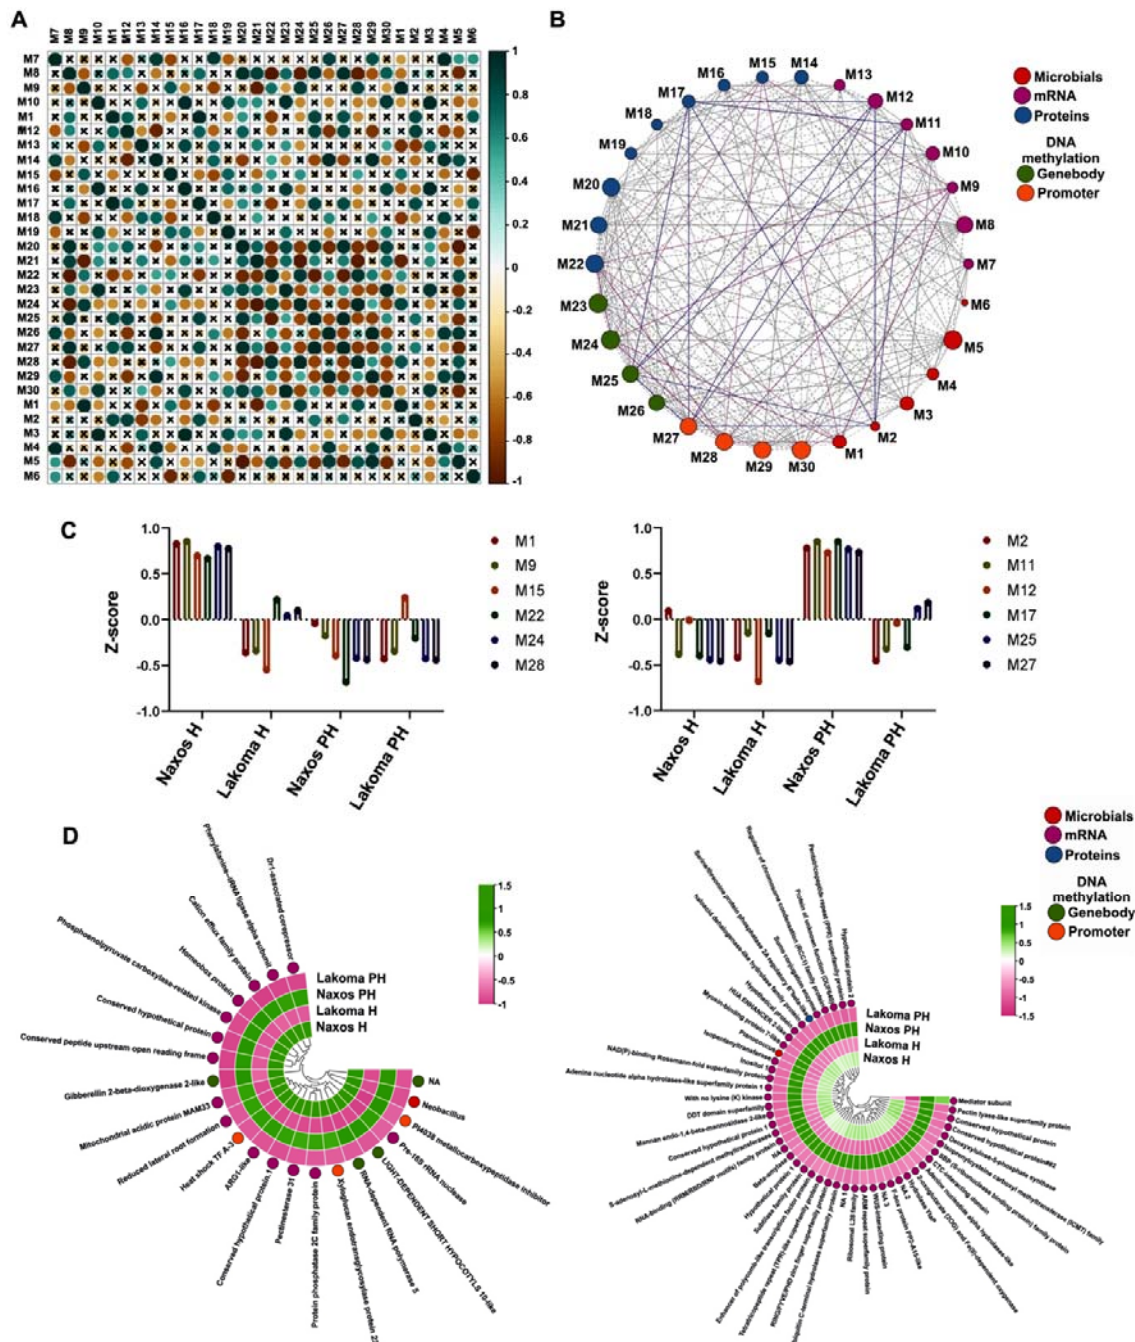

695 **Figure 6.** Weighted correlation network analysis (WGCNA) of microbials, mRNAs, proteins,  
 696 and DNA methylation in Naxos vs Lakoma at harvest (H) and post-harvest (PH). (A) Pearson  
 697 correlation of 30 modules. The magnitude of the correlation is depicted in both the color and  
 698 size of the spheres. Correlations which were lower than 0.5 in absolute value are marked with  
 699 an 'x'. (B) Network illustration of microbials (Modules M1-M6), mRNAs (Modules M7-  
 700

701 M13), proteins (Modules M14-M22), and DNA methylation (genebody modules M23-M26,  
702 promoter modules M27-M30) and positive correlation of M1 and M2 with the rest of  
703 modules. The modules are represented by the network nodes. The edges connecting the nodes  
704 are displayed only when the nodes are correlated with a Pearson coefficient higher than 0.5 in  
705 absolute value. Solid lines correspond to positive correlations and dotted lines correspond to  
706 negative correlations. The thickness of the lines reflects the magnitude of the correlation  
707 (absolute values). The size of the node indicates the degree of centrality (number of edges  
708 drawn from the node). (C) The trend of modules-interest M1, M9, M15, M22, M24, M28, and  
709 M2, M11, M12, M17, M25, M27, based on their z-scores. (D) Heatmap of positive correlated  
710 ( $P \leq 0.01$ ) mRNAs (higher tpm than 2 in stages and areas), proteins, and DNA methylation  
711 with specific microbials: *Neobacillus* (M1) and *Planococcus* (M2). Data obtained from  
712 [Tables S12-S14](#).  
713

## 714 References

- 715 Ahmed, S., de la Parra, J., Elouafi, I., German, B., Jarvis, A., Lal, V., Lartey, A., Longvah, T.,  
716 Malpica, C., Vázquez-Manjarrez, N., Prenni, J., Aguilar-Salinas, C.A., Srichamnong,  
717 W., Rajasekharan, M., Shafizadeh, T., Siegel, J.B., Steiner, R., Tohme, J., Watkins, S.  
718 (2022). Foodomics: A Data-Driven Approach to Revolutionize Nutrition and Sustainable  
719 Diets. *Front Nutr* 0, 592. [10.3389/fnut.2022.874312](https://doi.org/10.3389/fnut.2022.874312)
- 720 Balkir, P., Kemahlioglu, K., Yucel, U. (2021). Foodomics: A new approach in food quality  
721 and safety. *Trends Food Sci Technol* 108, 49–57. [10.1016/J.TIFS.2020.11.028](https://doi.org/10.1016/J.TIFS.2020.11.028)
- 722 Baroja-Fernández, E., Muñoz, F.J., Montero, M., Etxeberria, E., Sesma, M.T., Ovecka, M.,  
723 Bahaji, A., Ezquer, I., Li, J., Prat, S., Pozueta-Romero, J. (2009). Enhancing Sucrose  
724 Synthase Activity in Transgenic Potato (*Solanum tuberosum* L.) Tubers Results in  
725 Increased Levels of Starch, ADPglucose and UDPglucose and Total Yield. *Plant Cell*  
726 *Physiol* 50, 1651–1662. [10.1093/pcp/pcp108](https://doi.org/10.1093/pcp/pcp108)
- 727 Baselga, A., Orme, C.D.L. (2012). betapart: an R package for the study of beta diversity.  
728 *Methods Ecol Evol* 3, 808–812. [10.1111/J.2041-210X.2012.00224.x](https://doi.org/10.1111/J.2041-210X.2012.00224.x)
- 729 Bendre, A.D., Ramasamy, S., Suresh, C.G. (2018). Analysis of Kunitz inhibitors from plants  
730 for comprehensive structural and functional insights. *Int J Biol Macromol* 113, 933–943.  
731 [10.1016/j.ijbiomac.2018.02.148](https://doi.org/10.1016/j.ijbiomac.2018.02.148)
- 732 Braconi, D., Millucci, L., Parisi, M.L., Spiga, O., Santucci, A. (2021). Omics-based  
733 technologies for food authentication and traceability. *Food Authentication and*  
734 *Traceability* 215–245. [10.1016/B978-0-12-821104-5.00003-9](https://doi.org/10.1016/B978-0-12-821104-5.00003-9)
- 735 Calvo, P., Ormeño-Orrillo, E., Martínez-Romero, E., Zúñiga, D. (2010). Characterization of  
736 *Bacillus* isolates of potato rhizosphere from andean soils of Peru and their potential  
737 PGPR characteristics. *Brazilian journal of microbiology* 41, 899–906. [10.1590/S1517-83822010000400008](https://doi.org/10.1590/S1517-83822010000400008)
- 739 Capozzi, F., Bordoni, A. (2012). Foodomics: a new comprehensive approach to food and  
740 nutrition. *Genes Nutr* 8, 1–4. <https://doi.org/10.1007/S12263-012-0310-x>
- 741 Dalakouras, A., Vlachostergios, D. (2021). Epigenetic approaches to crop breeding: current  
742 status and perspectives. *J Exp Bot* 72, 5356–5371. [10.1093/JXB/ERAB227](https://doi.org/10.1093/JXB/ERAB227)
- 743 Delegou, E.T., Karapiperis, C., Zoe, H., Chasapi, A., Hilioti, Z., Valasiadis, D., Alexandridou,  
744 A., Rihani, V., Kroustalaki, M., Bris, T., Ouzounis, C.A., Salakidis, A., Moropoulou, A.  
745 (2022). Metagenomics of the built cultural heritage: Microbiota characterization of the  
746 building materials of the holy aedicule of the holy sepulchre in Jerusalem. *Scientific*  
747 *culture* 8, 59–83. [10.5281/zenodo.5772545](https://doi.org/10.5281/zenodo.5772545)

- 748 di Tommaso, P., Floden, E.W., Magis, C., Palumbo, E., Notredame, C. (2017). Nextflow, an  
749 efficient tool to improve computation numerical stability in genomic analysis. *Biol*  
750 *Aujourd'hui* 211, 233–237. 10.1051/JBIO/2017029
- 751 Doyle J. J., Doyle J. L. (1990). Isolation of Plant DNA from Fresh Tissue. *Focus (Madison)*  
752 12, 13–15.
- 753 Eklöf, J.M., Brumer, H. (2010). The XTH Gene Family: An Update on Enzyme Structure,  
754 Function, and Phylogeny in Xyloglucan Remodeling. *Plant Physiol* 153, 456–466.  
755 10.1104/pp.110.156844
- 756 Fierer, N., Jackson, R.B. (2006). The diversity and biogeography of soil bacterial  
757 communities. *Proc Natl Acad Sci U S A* 103, 626–631. 10.1073/pnas.0507535103
- 758 Fujimori, N., Suzuki, N., Nakajima, Y., Suzuki, S. (2014). Plant DNA-damage  
759 repair/tolerance 100 protein repairs UV-B-induced DNA damage. *DNA Repair (Amst)*  
760 21, 171–176. 10.1016/j.dnarep.2014.05.009
- 761 Galili, T. (2015). dendextend: an R package for visualizing, adjusting and comparing trees of  
762 hierarchical clustering. *Bioinformatics* 31, 3718–3720. 10.1093/bioinformatics/btv428
- 763 Genitsaris, S., Stefanidou, N., Leontidou, K., Matsi, T., Karamanoli, K., Mellidou, I. (2020).  
764 Bacterial Communities in the Rhizosphere and Phyllosphere of Halophytes and Drought-  
765 Tolerant Plants in Mediterranean Ecosystems. *Microorganisms* 8, 1708.  
766 10.3390/microorganisms8111708
- 767 Iquebal, M.A., Jagannadham, J., Jaiswal, S., Prabha, R., Rai, A., Kumar, D. (2022). Potential  
768 Use of Microbial Community Genomes in Various Dimensions of Agriculture  
769 Productivity and Its Management: A Review. *Front Microbiol* 13.  
770 10.3389/fmicb.2022.708335
- 771 Kim, D., Song, L., Breitwieser, F.P., Salzberg, S.L. (2016). Centrifuge: rapid and sensitive  
772 classification of metagenomic sequences. *Genome Res* 26, 1721–1729.  
773 10.1101/gr.210641.116
- 774 Krueger, F., Andrews, S.R. (2011). Bismark: a flexible aligner and methylation caller for  
775 Bisulfite-Seq applications. *Bioinformatics* 27, 1571–1572.  
776 <https://doi.org/10.1093/bioinformatics/btr167>
- 777 Leontidou, K., Genitsaris, S., Papadopoulou, A., Kamou, N., Bosmali, I., Matsi, T., Madesis,  
778 P., Vokou, D., Karamanoli, K., Mellidou, I. (2020). Plant growth promoting  
779 rhizobacteria isolated from halophytes and drought-tolerant plants: genomic  
780 characterisation and exploration of phyto-beneficial traits. *Scientific Reports* 10, 1–15.  
781 10.1038/s41598-020-71652-0
- 782 Lira-Medeiros, C.F., Parisod, C., Fernandes, R.A., Mata, C.S., Cardoso, M.A., Ferreira,  
783 P.C.G. (2010). Epigenetic Variation in Mangrove Plants Occurring in Contrasting  
784 Natural Environment. *PLoS One* 5, e10326. 10.1371/journal.pone.0010326
- 785 López, C.M.R., Wilkinson, M.J. (2015). Epi-fingerprinting and epi-interventions for  
786 improved crop production and food quality. *Front Plant Sci* 6, 397.  
787 10.3389/fpls.2015.00397
- 788 Nerva, L., Sandrini, M., Moffa, L., Velasco, R., Balestrini, R., Chitarra, W. (2022). Breeding  
789 toward improved ecological plant–microbiome interactions. *Trends Plant Sci*.  
790 10.1016/j.tplants.2022.06.004
- 791 Ortiz, O., Mares, V. (2017). The Historical, Social, and Economic Importance of the Potato  
792 Crop, in: Kumar Chakrabarti, S., Xie, C., Kumar Tiwari, J. (Springer, Cham), *The Potato*  
793 *Genome*. Springer Cham., pp. 1–10.
- 794 Pearsall, D.M. (2008). Plant Domestication and the Shift to Agriculture in the Andes. *The*  
795 *Handbook of South American Archaeology* 105–120.
- 796 Perez-Riverol, Y., Bai, J., Bandla, C., García-Seisdedos, D., Hewapathirana, S.,  
797 Kamatchinathan, S., Kundu, D.J., Prakash, A., Frericks-Zipper, A., Eisenacher, M.,

- 798 Walzer, M., Wang, S., Brazma, A., Vizcaíno, J.A. (2022). The PRIDE database  
799 resources in 2022: a hub for mass spectrometry-based proteomics evidences. *Nucleic*  
800 *Acids Res* 50, D543–D552. 10.1093/nar/gkab1038
- 801 Plant Production and Protection Division (2009). International Year of the Potato 2008 - New  
802 light on a hidden treasure.
- 803 Posner, J.L., Baldock, J.O., Hedtcke, J.L. (2008). Organic and Conventional Production  
804 Systems in the Wisconsin Integrated Cropping Systems Trials: I. Productivity 1990–  
805 2002. *Agron J* 100, 253–260. 10.2134/agronj2007.0058
- 806 Roxas, V.P., Smith, R.K., Smith, R.K., Allen, R.D. (1997). Overexpression of glutathione S-  
807 transferase/glutathioneperoxidase enhances the growth of transgenic tobacco seedlings  
808 during stress. *Nat Biotechnol* 15, 988–991. 10.1038/nbt1097-988
- 809 Santner, A., Estelle, M. (2009). Recent advances and emerging trends in plant hormone  
810 signalling. *Nature* 459, 1071–1078. 10.1038/nature08122
- 811 Segata, N., Izard, J., Waldron, L., Gevers, D., Miropolsky, L., Garrett, W.S., Huttenhower, C.  
812 (2011). Metagenomic biomarker discovery and explanation. *Genome Biol* 12, 1–18.  
813 10.1186/gb-2011-12-6-r60
- 814 Sentandreu, M.A., Sentandreu, E. (2011). Peptide biomarkers as a way to determine meat  
815 authenticity. *Meat Sci* 89, 280–285. 10.1016/j.meatsci.2011.04.028
- 816 Shoji, T., Winz, R., Iwase, T., Nakajima, K., Yamada, Y., Hashimoto, T. (2002). Expression  
817 patterns of two tobacco isoflavone reductase-like genes and their possible roles in  
818 secondary metabolism in tobacco. *Plant Mol Biol* 50, 427–440.  
819 10.1023/a:1019867732278
- 820 Sonnewald, S., Sonnewald, U. (2014). Regulation of potato tuber sprouting. *Planta* 239, 27–  
821 38. 10.1007/s00425-013-1968-z
- 822 Spooner, D.M., McLean, K., Ramsay, G., Waugh, R., Bryan, G.J. (2005). A single  
823 domestication for potato based on multilocus amplified fragment length polymorphism  
824 genotyping. *Proc Natl Acad Sci U S A* 102, 14694–14699. 10.1073/pnas.0507400102
- 825 Tang, X., Zhang, N., Si, H., Calderón-Urrea, A. (2017). Selection and validation of reference  
826 genes for RT-qPCR analysis in potato under abiotic stress. *Plant Methods* 13, 1–8.  
827 10.1186/s13007-017-0238-7
- 828 Verhoeven, K.J.F., Jansen, J.J., van Dijk, P.J., Biere, A. (2010). Stress-induced DNA  
829 methylation changes and their heritability in asexual dandelions. *New Phytol* 185, 1108–  
830 1118. 10.1111/j.1469-8137.2009.03121.x
- 831 Wei, S., Yun, B., Liu, S., Ding, T. (2022). Multiomics technology approaches in blue foods.  
832 *Curr Opin Food Sci* 45, 100833. 10.1016/j.cofs.2022.100833
- 833 Xanthopoulou, A., Montero-Pau, J., Picó, B., Boumpas, P., Tsaliki, E., Paris, H.S.,  
834 Tsaftaris, A., Kalivas, A., Mellidou, I., Ganopoulos, I. (2021). A comprehensive  
835 RNA-Seq-based gene expression atlas of the summer squash (*Cucurbita pepo*)  
836 provides insights into fruit morphology and ripening mechanisms. *BMC Genomics*  
837 22. 10.1186/s12864-021-07683-2

838

### 839 **Supplemental information**

840 Table S1. Number of reads and operational taxonomic units (OTUs) for bacterial  
841 communities of *S. tuberosum* at harvest and post-harvest.

842 Table S2. Summary of whole genome DNA bisulfite sequencing data at harvest and post-  
843 harvest.

844 Table S3. Statistics of raw, clean and mapped reads from RNA sequencing at harvest and  
845 post-harvest.

846 Table S4. Overview of RNA sequencing data at harvest and post-harvest.  
847 Table S5. Differential expression analysis of proteomics data at harvest and post-harvest.  
848 Table S6. Integration of transcriptomic (gene) and methylation data to perform dual co-  
849 expression analyses. at harvest and post-harvest.  
850 Table S7. Integration of transcriptomic (promoter) and methylation data to perform dual co-  
851 expression analyses. at harvest and post-harvest.  
852 Table S8. Integration of transcriptomic and proteomic data to perform dual co-expression  
853 analyses. at harvest and post-harvest.  
854 Table S9. Combination of multi-omics dataset at harvest and post-harvest.  
855 Table S10. Methylome genebody, transcriptome and proteome interaction at harvest and  
856 post-harvest.  
857 Table S11. Methylome promoter, transcriptome and proteome interaction at harvest and post-  
858 harvest.  
859 Table S12. Modules generated from weighted network analysis (WGCNA) at harvest and  
860 post-harvest.  
861 Table S13. Pearson correlation between targeted microbial genus and -omics data at harvest  
862 and post-harvest.  
863 Table S14. Module eigenvalues at harvest and post-harvest.  
864 Table S15. Coordinates for the sampling locations, as well as the samples used for each -  
865 omic experiment.  
866 Table S16. Composition analysis of *S. tuberosum*.  
867 Table S17. Gene expression profiles of ten genes analyzed by Quantitative real time (qRT).  
868  
869  
870  
871
